# Supplementary material for: The International Prognostic Index for Patients with Chronic Lymphocytic Leukemia Has the Higher Value in Predicting Overall Outcome Compared with the Barcelona-Brno Biomarkers Only Prognostic Model and the MD Anderson Cancer Center Prognostic Index
Source: Hindawi journal article supplement (doi:10.1155/2018/9506979), 2018-01-01

## **SUPPLEMENTARY INFORMATION**

### **Univariate and multivariate analyses**

We analyzed the association of the prognostic factors of each index with OS, as well as the HR of the univariate and multivariate analyses.

Regarding the univariate analysis of the sample used for the validation of the MDACC index, significance was shown for age,  $\beta$ 2-microglobulin, absolute lymphocyte count, number of nodal regions affected and Rai stage. In the sex variable, a trend close to statistical significance was observed ( $p = 0.0067$ ). However, in the multivariate analysis, significance was shown for sex but not for absolute lymphocyte count ( $p = 0.111$ ). The factor that showed the greatest impact in the multivariate analysis was the pooling of patients in 0/I/II Rai stage *vs* III/IV Rai stage (HR = 3.1). A more comprehensive explanation of these analysis can be observed in Table S1.

**Table S1.** Univariate and multivariate Cox regression analysis of the variables included in the MDACC score.

|                                             | Median OS (months)<br>(CI 95%) | P       | Univariate Cox regression            |         | Multivariate Cox regression |         |  |
|---------------------------------------------|--------------------------------|---------|--------------------------------------|---------|-----------------------------|---------|--|
|                                             |                                |         | HR (CI 95%)                          | P       | HR (CI 95%)                 | P       |  |
| <b>Age (years)</b>                          |                                |         |                                      |         |                             |         |  |
| <50                                         | 238.5 (0-477.1)                | 0.007   | 1.055 (1.032-1.078)                  | <0.0001 | 1.061 (1.035-1.086)         | <0.0001 |  |
| 50-65                                       | 173.2 (NE)                     |         | <i>for 1 year increase</i>           |         |                             |         |  |
| >65                                         | 142 (111.1-172.8)              |         |                                      |         |                             |         |  |
| <b>Sex</b>                                  |                                |         |                                      |         |                             |         |  |
| Male                                        | 147.3 (111-183.6)              | 0.067   | 1.521 (0.971-2.385)                  | 0.069   | 1.636 (1.016-2.636)         | 0.043   |  |
| Female                                      | 194.5 (126.5-262.5)            |         | 1 (ref)                              |         |                             |         |  |
| <b>β2-microglobulin (mg/L)</b>              |                                |         |                                      |         |                             |         |  |
| Normal                                      | 238.5 (NE)                     | <0.0001 | 1.276 (1.209-1.346)                  | <0.0001 | 1.137 (1.055-1.225)         | 0.001   |  |
| 1-2 x ULN                                   | 143.5 (102.2-184.8)            |         | <i>for 1mg/dL increase</i>           |         |                             |         |  |
| >2 x ULN                                    | 63.5 (NE)                      |         |                                      |         |                             |         |  |
| <b>Lymphocyte count (x10<sup>9</sup>/L)</b> |                                |         |                                      |         |                             |         |  |
| <20                                         | 194.5 (137.3-251.8)            | <0.0001 | 1.004 (1.002-1.006)                  | <0.0001 | 1.002 (1.000-1.005)         | 0.111   |  |
| 20-50                                       | 143.5 (63-224.1)               |         | <i>for 1x10<sup>9</sup> increase</i> |         |                             |         |  |
| >50                                         | 76.2 (44.9-107.5)              |         |                                      |         |                             |         |  |
| <b>Enlarged node regions</b>                |                                |         |                                      |         |                             |         |  |
| ≤2                                          | 194.5 (148.9-240.2)            | <0.0001 | 1 (ref)                              | <0.0001 | 2.454 (1.396-4.313)         | 0.002   |  |
| >2                                          | 73.9 (62.6-85.2)               |         | 3.700 (2.333-5.868)                  |         |                             |         |  |
| <b>Rai staging system</b>                   |                                |         |                                      |         |                             |         |  |
| 0-2                                         | 194.5 (145-244)                | <0.0001 | 1 (ref)                              | <0.0001 | 3.108 (1.471-6.566)         | 0.003   |  |
| 3-4                                         | 71.5 (23.2-119.7)              |         | 5.770 (3.205-10.389)                 |         |                             |         |  |

OS, overall survival; CI95%, 95% confidence interval; HR, hazard ratio; NE, not evaluable; ULN, upper limit normal; MDACC: MD Anderson Cancer Center.

In the univariate analysis of the CLL-IPI sample,  $\beta$ 2-microglobulin, 17p-, *IGHV* mutational state, Rai stage and Binet stage were statistically significant. Only the comparison between patients  $\leq 65$  vs  $> 65$  years old did not obtain statistical significance ( $p = 0.171$ ). However, in the multivariate analysis, no association between  $\beta$ 2-microglobulin and OS ( $p = 0.268$ ) was observed, but there was association when age was quantitatively analyzed. The factor with the greatest impact was 17p- (HR = 9.396). Details of these analyses can be seen in Table S2.

**Table S2.** Univariate and multivariate Cox regression analysis of the variables included in the CLL-IPI score.

|                                | Median OS (months)<br>(CI 95%) | P       | Univariate Cox regression  |                    | Multivariate Cox regression |         |
|--------------------------------|--------------------------------|---------|----------------------------|--------------------|-----------------------------|---------|
|                                |                                |         | HR (CI 95%)                | P                  | HR (CI 95%)                 | P       |
| <b>Age (years)</b>             |                                |         |                            |                    |                             |         |
| <65                            | 238.5 (126.4-350.6)            | 0.171   | 1.031 (1.003-1.059)        | 0.028              | 1.047 (1.016-1.078)         | 0.003   |
| ≥65                            | Not reached                    |         | <i>for 1 year increase</i> |                    |                             |         |
| <b>β2-microglobulin (mg/L)</b> |                                |         |                            |                    |                             |         |
| ≤ 3.5                          | 238.5 (129.9-347.2)            | <0.0001 | 1.510 (1.273-1.791)        | <0.0001<br>(n=237) | 1.133 (0.909-1.412)         | 0.268   |
| >3.5                           | 71.5 (58.1-84.8) <sup>9</sup>  |         | <i>for 1mg/dL increase</i> |                    |                             |         |
| <b>Del 17p-</b>                |                                |         |                            |                    |                             |         |
| Yes                            | 31.8 (23.5-40.0)               | <0.0001 | 11.478 (4.087-32.236)      | <0.0001            | 9.396 (3.159-27.943)        | <0.0001 |
| Not                            | 238.5 (129.4-347.6)            |         | 1 (ref)                    |                    |                             |         |
| <b>IGHV mutation status</b>    |                                |         |                            |                    |                             |         |
| Mutated                        | 238.5 (146.8-330.2)            | <0.0001 | 1 (ref)                    |                    | 2.066 (1.003-4.136)         | 0.040   |
| Non-mutated                    | 131.9 (92.4-171.4)             |         | 3.141 (1.740-5.673)        |                    |                             |         |
| <b>Rai staging system</b>      |                                |         |                            |                    |                             |         |
| 0                              | Not reached                    |         | 1 (ref)                    |                    |                             |         |
| 1-2                            | 105.8 (31.8-179.8)             | <0.0001 | 5.909 (3.080-11.337)       |                    | 5.256 (2.541-11.288)        | <0.0001 |
| 3-4                            | 71.5 (NE)                      |         | 9.038 (2.995-27.274)       |                    |                             |         |

OS, overall survival; CI95%, 95% confidence interval; HR, hazard ratio; NE, not evaluable; ULN, upper

limit normal; CLL-IPI: Chronic Lymphocytic Leukemia International Prognostic Index.

**Figure S1.** ROC curve for MDACC PI. (A) Overall Survival. (B) Time to First Therapy.

(A)

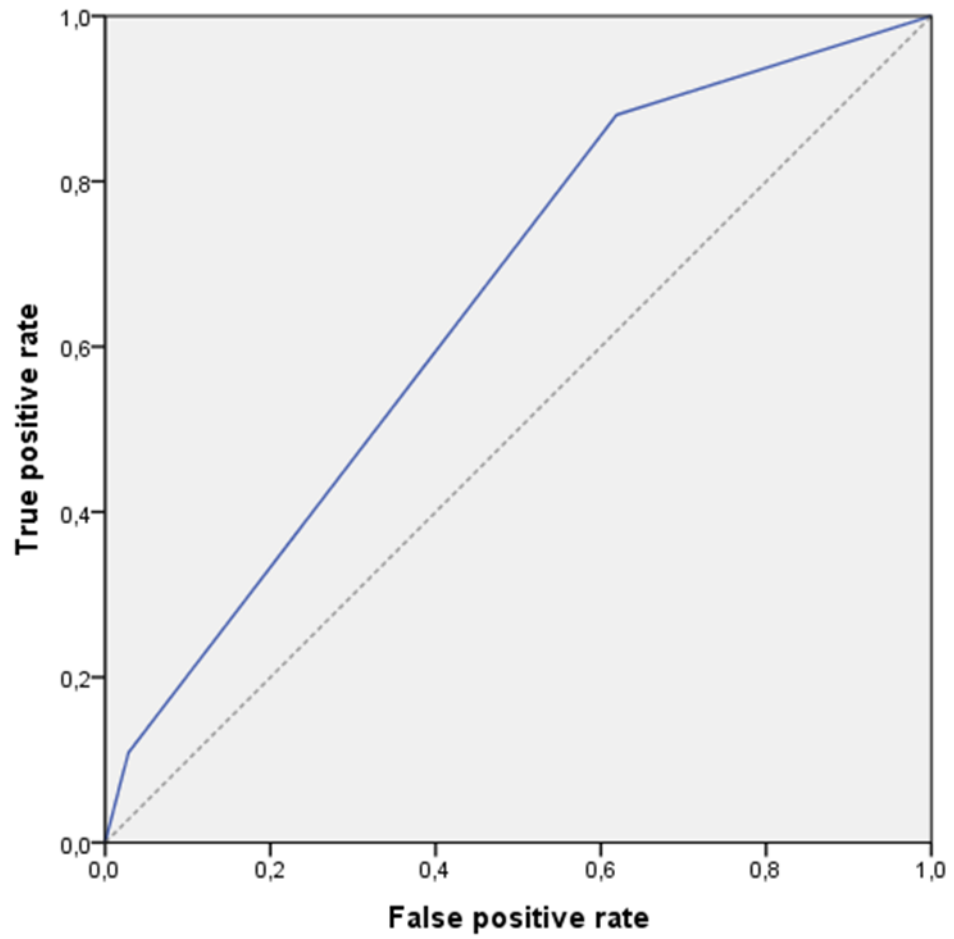

**(B)**

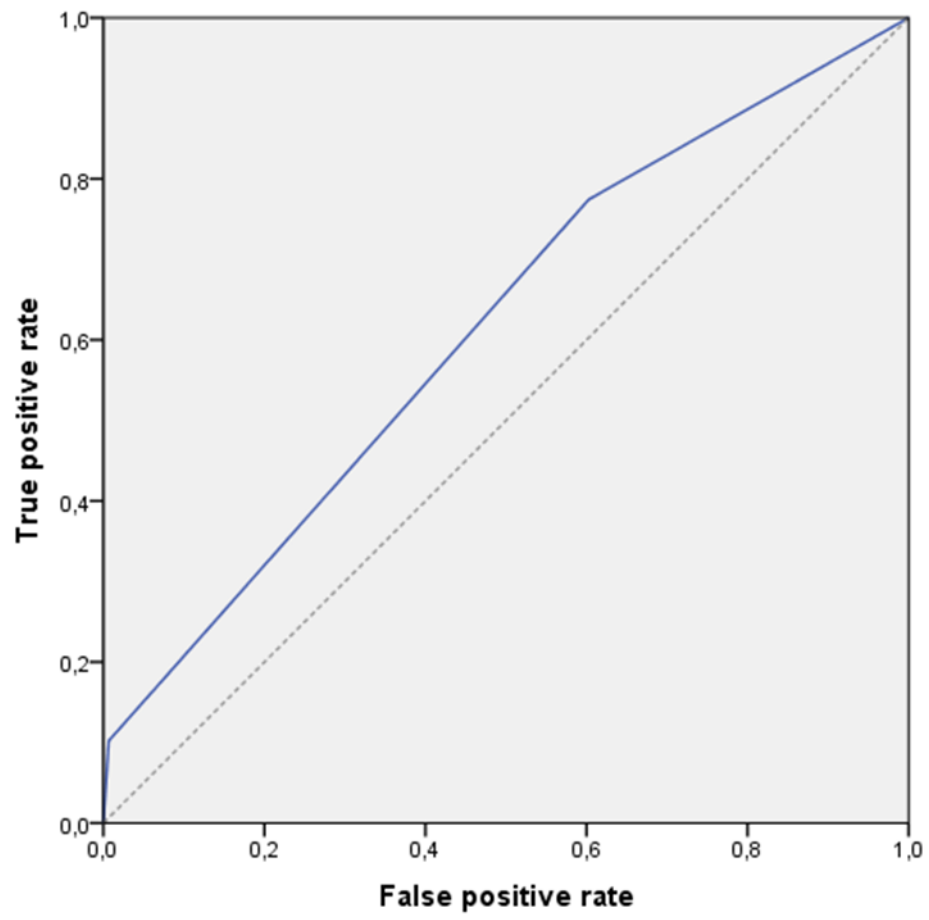

**Figure S2.** ROC curve for CLL-IPI. (A) Overall Survival. (B) Time to First Therapy.

(A)

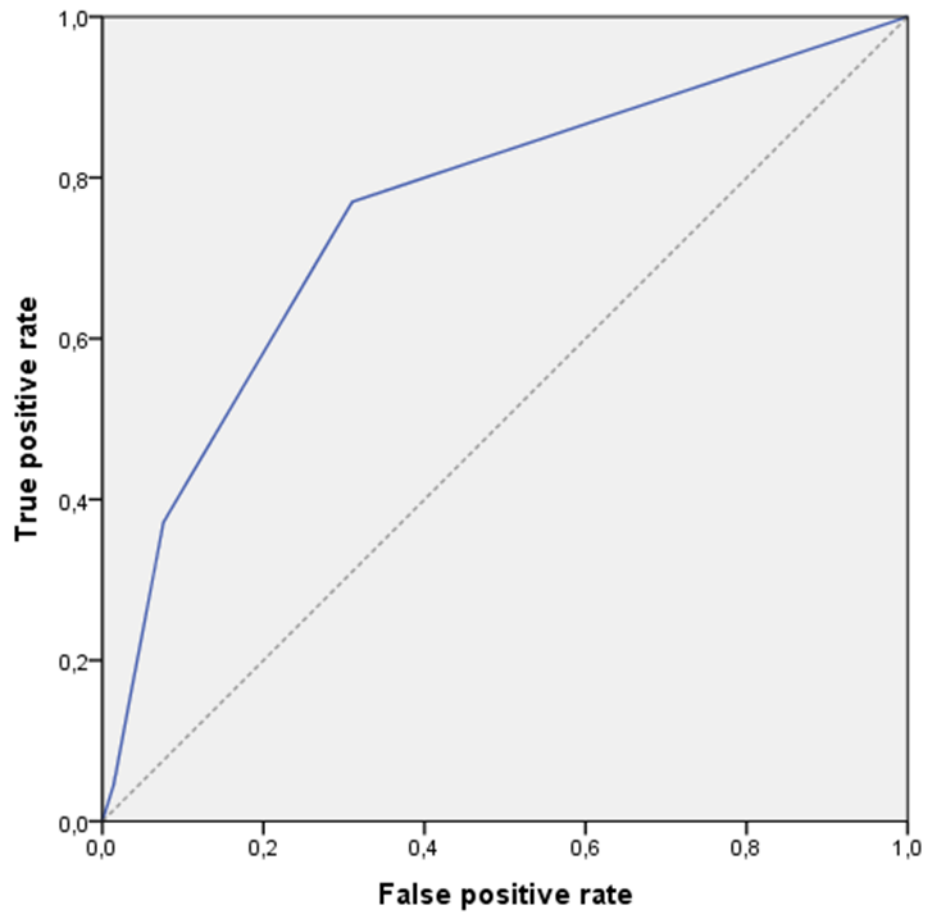

**(B)**

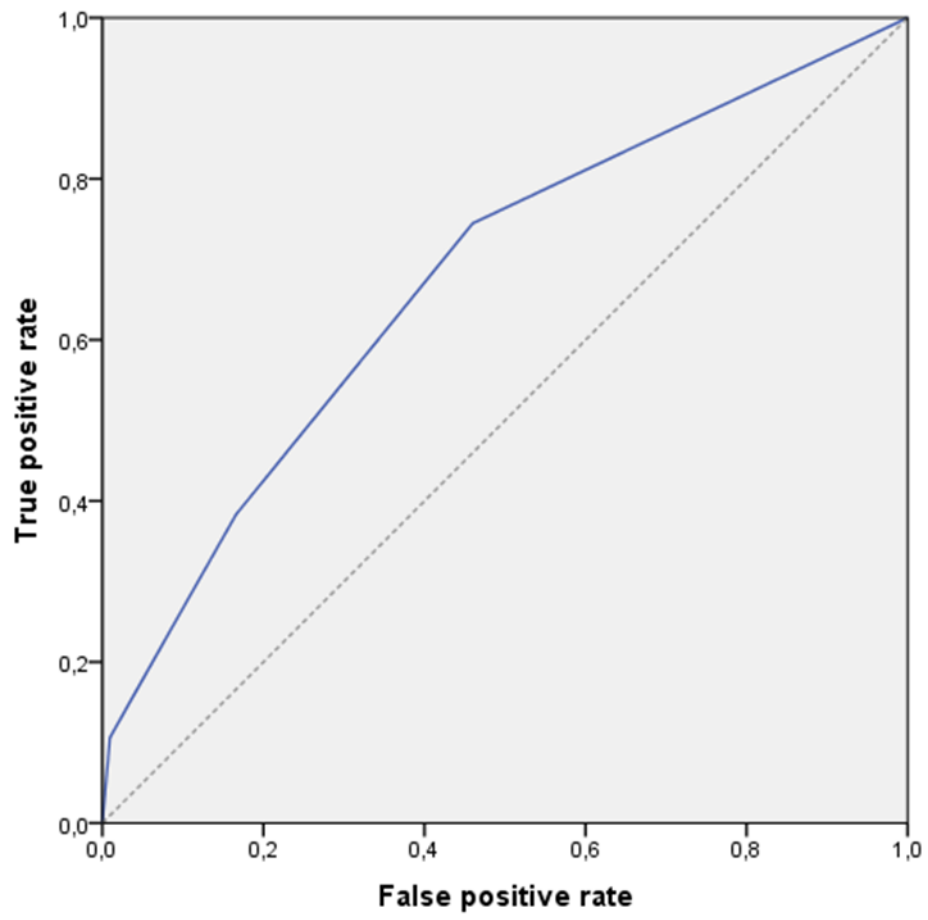



**Figure S3.** ROC curve for Barcelona-Brno biomarkers only prognostic model.

(A) Overall Survival. (B) Time to First Therapy.

(A)

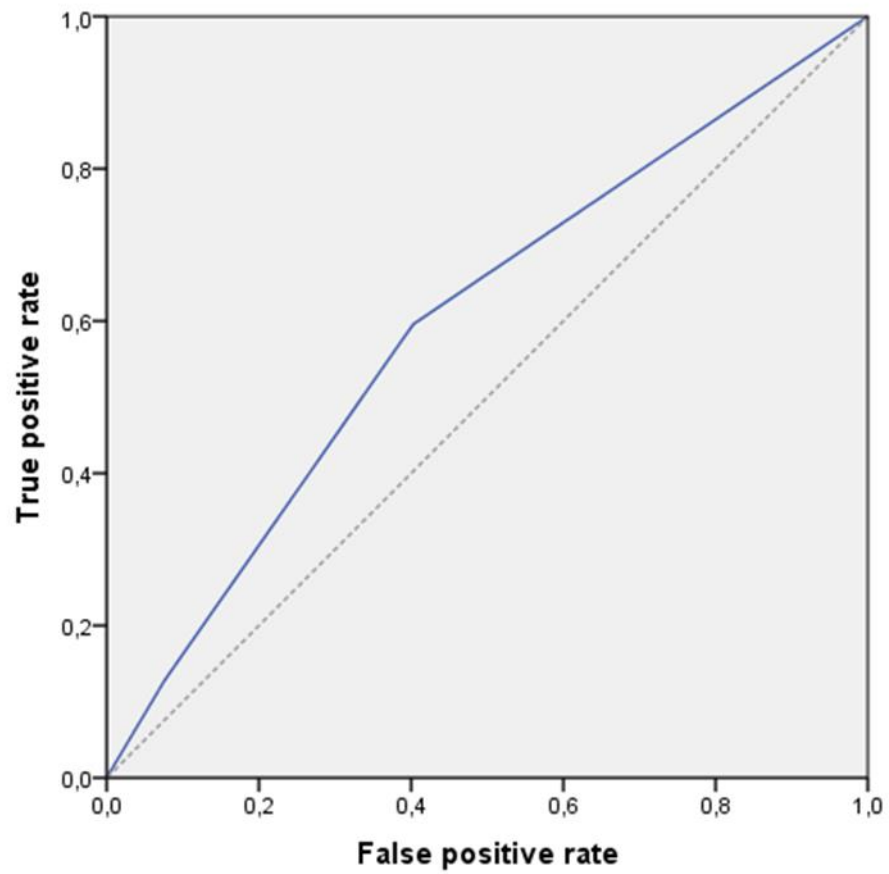

**(B)**

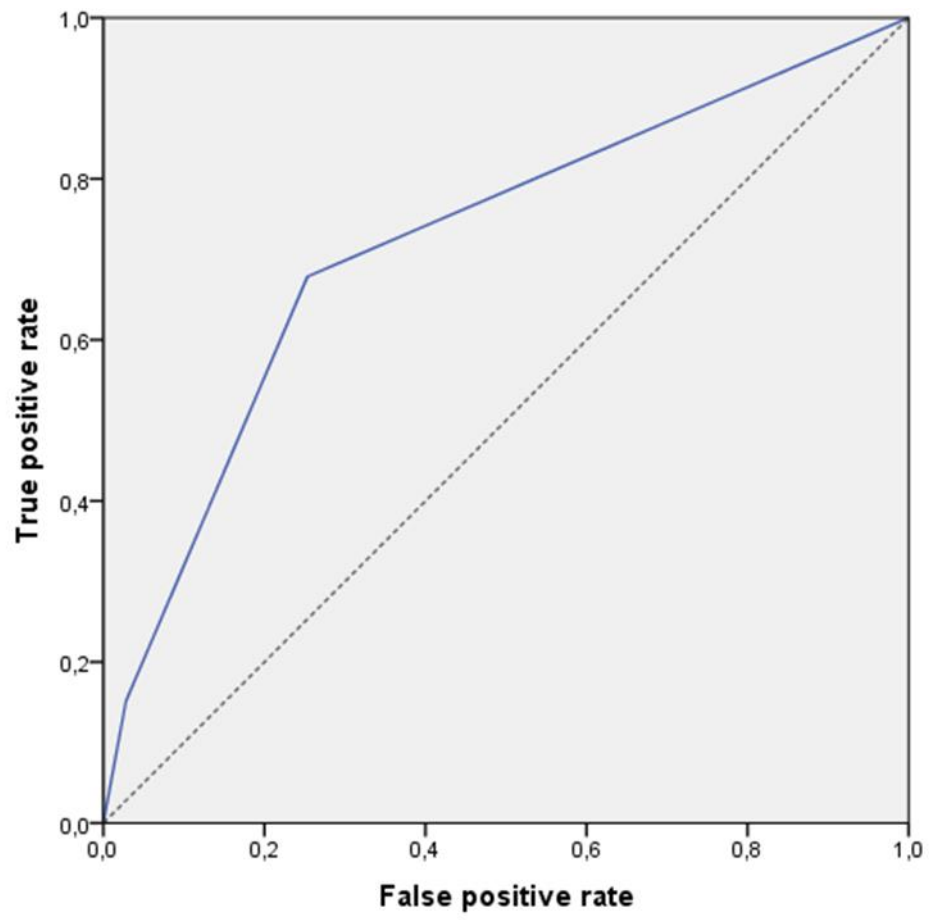

Supplement: f1 [file 9506979.f1.pdf]
